# Supplementary material for: Outcomes and a prognostic classifier in patients with microsatellite instability-high metastatic gastric cancer receiving PD-1 blockade
Source: PubMed Central journal article supplement — J Immunother Cancer. 2023 Jun 5;11(6):e007104. doi: 10.1136/jitc-2023-007104 (PMC10255232; doi:10.1136/jitc-2023-007104), 2023-06-05
Supplement: jitc-2023-007104supp001.pdf [file jitc-2023-007104supp001.pdf]

## Predicted median PFS

## Risk category

## Proposed management

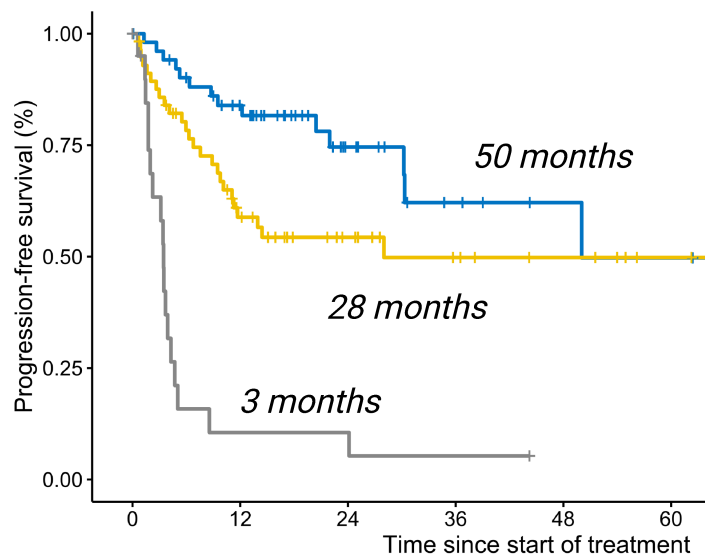

LOW RISK

Anti-PD-1 monotherapy

INTERMEDIATE RISK

Anti-PD-1 +/- 1-Line chemotherapy  
 Anti-PD-1 +/- anti-CTLA-4 in any line  
 (Chemotherapy may be still useful if rapid shrinkage is needed)

POOR RISK

Anti-PD-1 + 1-Line chemotherapy  
 Anti-PD-1 + anti-CTLA-4 in any line  
 Clinical trials with novel ICI combos

*Note: not intended for clinical use*
