# Supplementary material for: Outcomes and a prognostic classifier in patients with microsatellite instability-high metastatic gastric cancer receiving PD-1 blockade
Source: PubMed Central journal article supplement — J Immunother Cancer. 2023 Jun 5;11(6):e007104. doi: 10.1136/jitc-2023-007104 (PMC10255232; doi:10.1136/jitc-2023-007104), 2023-06-05
Supplement: jitc-2023-007104supp002.pdf [file jitc-2023-007104supp002.pdf]

## **Outcomes and a prognostic classifier in patients with microsatellite instability-high metastatic gastric cancer receiving PD-1 blockade**

Giovanni Randon, Yu Aoki, Romain Cohen, Leonardo Provenzano, Vincenzo Nasca, Samuel J. Klempner, Steven B. Maron, Riccardo Cerantola, Joseph Chao, Lorenzo Fornaro, Walter Ferrari Bravo, Filippo Ghelardi, Margherita Ambrosini, Paolo Manca, Massimiliano Salati, Akihito Kawazoe, Valerie Zhu, Darren Cowzer, Virginia Genovesi, Sara Lonardi, Kohei Shitara, Thierry André and Filippo Pietrantonio

### **Supplemental Material**

- Supplemental Figure S1
- Supplemental Figure S2
- Supplementary Table S1

**Supplemental Figure S1.** Kaplan-Meier estimates for progression-free survival (panel A) and overall survival (panel B) according to anti-PD-1-based therapy.

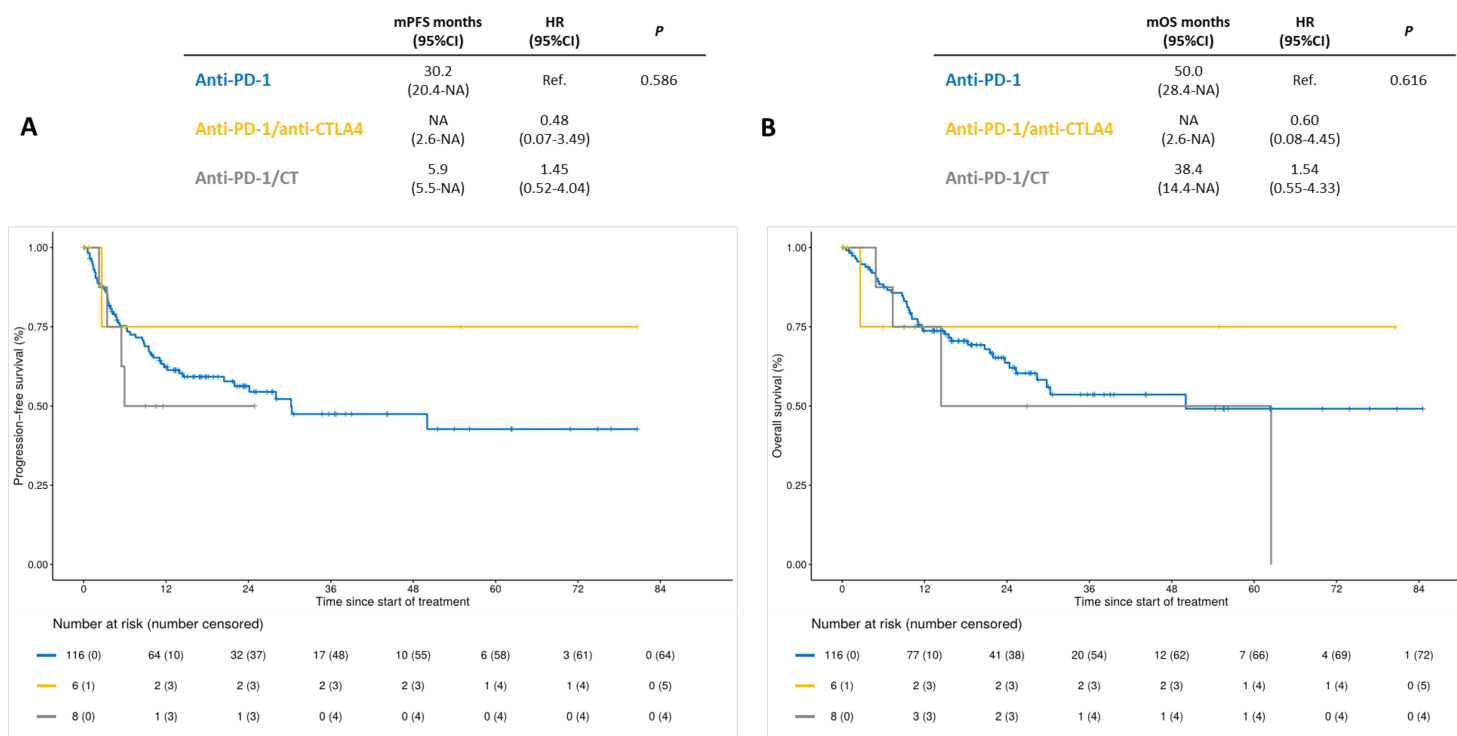

**Abbreviations.** mOS: median overall survival. mPFS: median progression-free survival.

**Supplemental Figure S2.** Response parameters in patients with measurable disease according to RECIST v1.1.

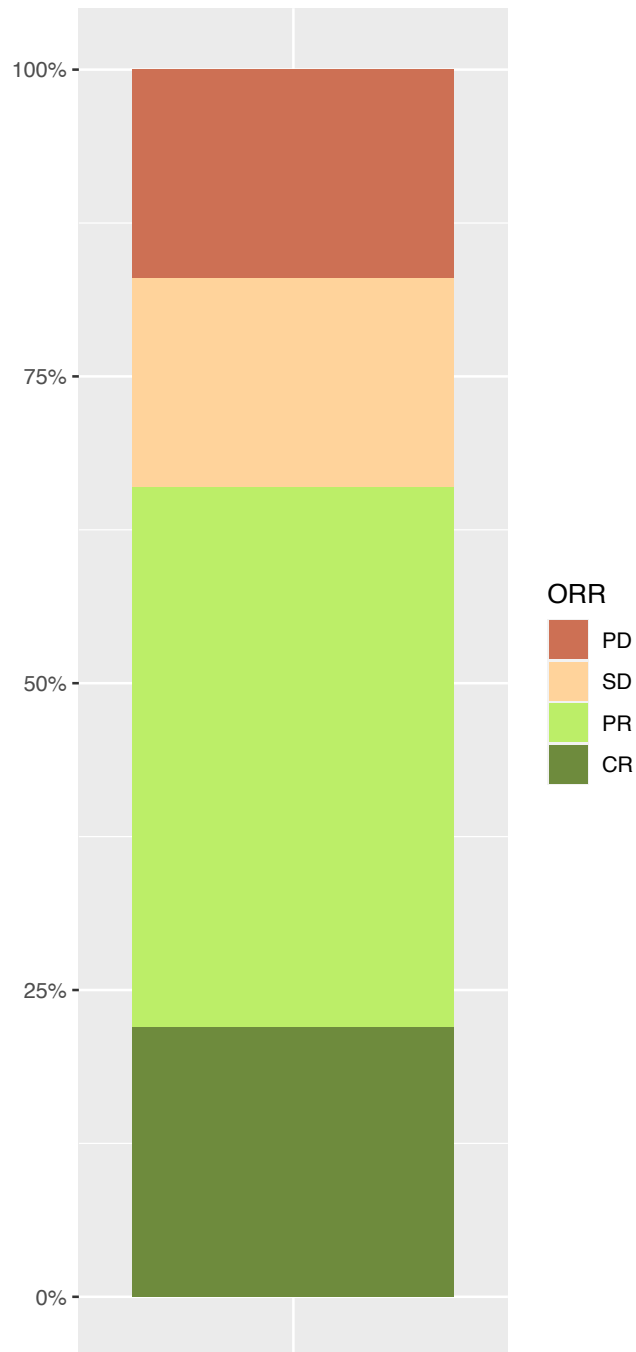

**Abbreviations.** CR: complete response. ORR: objective response rate. PD: progressive disease. PR: partial response. RECIST: Response Evaluation Criteria in Solid Tumors. SD: stable disease.

**Supplemental Table S1.** Multivariate analysis for OS and scoring system.

| <b>Risk score for overall survival</b> |           |                  |                 |                |                           |                      |
|----------------------------------------|-----------|------------------|-----------------|----------------|---------------------------|----------------------|
| <b>Characteristics</b>                 |           | <b>Median HR</b> | <b>IQ range</b> | <b>Log(HR)</b> | <b>Normalized log(HR)</b> | <b>Rounded score</b> |
| ECOG PS                                | 1 vs 0    | 1.40             | 0.68-2.90       | 0.15           | 1.00                      | <b>1</b>             |
| ECOG PS                                | 2 vs 0    | 5.98             | 1.91-18.68      | 0.78           | 5.20                      | <b>5</b>             |
| T resected                             | No vs Yes | 2.27             | 1.07-5.00       | 0.36           | 2.40                      | <b>2</b>             |
| Bone metastases                        | Yes vs No | 4.73             | 1.53-14.64      | 0.67           | 4.47                      | <b>4</b>             |
| Ascites                                | Yes vs No | 4.08             | 1.85-8.96       | 0.61           | 4.06                      | <b>4</b>             |

**Abbreviations.** ECOG PS: Eastern Cooperative Oncology Group Performance Status. IQ range: interquartile range. T: primary tumor.
